RESEARCH ARTICLE

# Bacterial profile, treatment outcomes, and determinants among adult patients with musculoskeletal infections admitted to Jimma Medical Center: A prospective observational study

Desalegn Gizaw<sup>✉</sup>, Gorfineh Teshome<sup>ORCID</sup>, Kisi Chemedo<sup>ORCID</sup>, Aster Wakjira, Mekonnen Damessa<sup>ORCID</sup>\*

Department of Clinical Pharmacy, Jimma University, Institute of Health, Jimma, Ethiopia

✉ These authors contributed equally to this work.

\* [mekonnenmoke4@gmail.com](mailto:mekonnenmoke4@gmail.com)

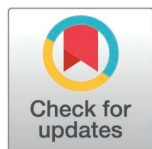

**OPEN ACCESS**

**Citation:** Gizaw D, Teshome G, Chemedo K, Wakjira A, Damessa M (2025) Bacterial profile, treatment outcomes, and determinants among adult patients with musculoskeletal infections admitted to Jimma Medical Center: A prospective observational study. PLoS One 20(5): e0322471. <https://doi.org/10.1371/journal.pone.0322471>

**Editor:** Nan Jiang, Southern Medical University Nanfang Hospital, CHINA

**Received:** January 9, 2025

**Accepted:** March 21, 2025

**Published:** May 2, 2025

**Copyright:** © 2025 Gizaw et al. This is an open access article distributed under the terms of the [Creative Commons Attribution License](https://creativecommons.org/licenses/by/4.0/), which permits unrestricted use, distribution, and reproduction in any medium, provided the original author and source are credited.

**Data availability statement:** All data are in the manuscript and/or supporting information files.

**Funding:** This work was supported by Jimma University Institute of Health; grant number [JUIH/1212/22]. The funders had no role in

## Abstract

### Background

The epidemiological characteristics of musculoskeletal infections are constantly evolving. Despite the significant burden of musculoskeletal infections in sub-Saharan Africa, there is a scarcity of data regarding the potential causes and treatment outcomes of such infections in the region. Therefore, the primary objective of this study was to assess a management protocol, clinical outcomes, and associated factors among adult individuals diagnosed with musculoskeletal infections.

### Methods

Adult patients admitted to Jimma University Medical Center (JUMC), Ethiopia with a diagnosis of musculoskeletal infections was enrolled prospectively from July 2022-December 2022. Clinical characteristics, management protocol, and complications were recorded from admission to discharge. Bacteria were identified by a series of biochemical tests, and antimicrobial susceptibility testing was performed using the Kirby-Bauer Disk diffusion method. Data were analyzed by using SPSS v.23 and the p-value <0.05 was considered statistically significant.

### Result

Among 160 participants included in the study, 103(64.37%) were male, and the mean age  $33.51 \pm 13.56$  years. About 94 (58.8%) of patients had microbial growth, of which 75.5% accounts for mono-microbial. *The common bacterial isolates were Staphylococcus aureus* in (22.4%), *Escherichia coli* (18.1%), *Pseudomonas aeruginosa* (14.7) and *Klebsiella pneumonia* (11.2). The isolated etiologies were resistant

study design, data collection and analysis, decision to publish, or preparation of the manuscript.

**Competing interests:** The authors have declared that no competing interests exist.

**Abbreviations:** AST: Antimicrobial Susceptibility Tests; BJI: Bone and Joint Infection; BMI: Body mass Index; CBC: Complete blood count; CoNS: Coagulase-Negative Staphylococci; CRP: C-reactive protein; DVT: Deep vein thrombosis; ESR: Erythrocyte sedimentation rate; GNB: Gram-Negative Bacteria; IV: Intravenously; JMC: Jimma Medical Center; MRSA: Methicillin-resistant *Staphylococcus aureus*; MSKI: Musculoskeletal Infection; MSSA: Methicillin-Sensitive *Staphylococcus aureus*; NRI: Non-Implant Related Infections; OAI: Osteoarticular Infection; OM: Osteomyelitis; OIRIs: Orthopedic implant-related infections; PJI: Periprosthetic joint infection; SA: Septic arthritis; SSIs: Surgical Site Infections; SSTIs: Skin and Soft-tissue Infections

to Ceftriaxone in 67(81.70%) and Ceftazidime in 47(61.8%) of test results. Nearly all (98.8%) of patients were took antibiotics on admission and Ceftriaxone was highly utilized as monotherapy in (23.4%) of patients. Nearly half (46.9%) of the patients were develop treatment failure. Sex [AOR=2.56, 95%CI (1.07–6.23)], microbial growth [AOR=3.03, 95%CI (1.31–6.97)], ceftriaxone resistance [AOR=4.46, 95%CI (1.06–18.67)], co-morbidities [AOR=2.32, 95%CI (1.007–5.36)], and complications [AOR=2.80, 95%CI (1.26–6.20)] were associated with treatment failure outcome.

## Conclusion

Close to half of adult patients with musculoskeletal infections experienced treatment failure. *Staphylococcus aureus* stood out as the prevailing bacterial strain identified. The timely switching of parenteral antibiotics to oral counterparts, alongside timely surgical interventions, significantly enhanced the recovery outcomes for these individuals.

## Introduction

Musculoskeletal infections (MSKIs), including osteomyelitis, septic arthritis, and soft tissue infections, are significant public health concerns, particularly in low-resource settings like sub-Saharan Africa [1–4]. These infections are associated with high morbidity, prolonged hospital stays, and substantial healthcare costs [5]. Despite the high burden of MSKIs in this region [6–9], there is a paucity of data on the bacterial profiles, antimicrobial resistance patterns, and treatment outcomes among adult patients. This gap in knowledge hampers the development of effective management protocols and contributes to poor clinical outcomes.

In Ethiopia, musculoskeletal infections are among the leading causes of hospital admissions [6,8], yet there is limited evidence on the etiological agents, their resistance patterns, and the factors influencing treatment outcomes. Previous studies in Ethiopia have either focused on pediatric populations [6] or were retrospective in nature [10], leaving a critical gap in understanding the bacterial profile and treatment outcomes among adult patients. Furthermore, the rising prevalence of antimicrobial resistance, particularly to commonly used antibiotics like ceftriaxone, underscores the need for updated and context-specific data to guide empirical treatment and improve patient outcomes.

This study aimed to address these gaps by prospectively investigating the bacterial profile, antimicrobial resistance patterns, treatment outcomes, and determinants of treatment failure among adult patients with musculoskeletal infections admitted to Jimma Medical Center, Ethiopia. By identifying the predominant pathogens, their resistance profiles, and the factors associated with treatment failure, this study provides critical insights that can inform local treatment guidelines and improve the management of MSKIs in similar settings.

The findings of this study are expected to contribute to the limited body of evidence on musculoskeletal infections in sub-Saharan Africa and provide a foundation

for future research and policy interventions aimed at reducing the burden of these infections. Understanding the local epidemiology and resistance patterns is crucial for optimizing antibiotic use, reducing treatment failures, and improving patient outcomes in resource-limited settings

## Materials and methods

### Study design and population

The study was conducted at Jimma medical center (JMC), Jimma, Oromia, Ethiopia from July December 2022. JMC is located in Jimma town, situated around 352 kilometers southwest of Addis Ababa. Jimma Medical Center has been delivered services for approximately 20,000 inpatients, 160,000 outpatients, 11,000 emergency cases and 4,500 deliveries in a year. Additionally, JMC have a total of 20 wards with 671 beds; also, the study was carried out at Orthopedics, surgery, and medical wards. There are 40 beds in orthopedics, 78, and 86 beds in surgery and medical ward, respectively. Orthopedics ward and Surgery ward render service under Surgery department. Facility based prospective observational study was conducted [11].

All patients with signs and symptoms of musculoskeletal infections and fulfilling the inclusion criteria were enrolled by treating physician and confirmed through clinical examination. Patients with confirmed diagnosis of MSKIs, Patients who were willing to participate in the study were the inclusion criteria; while patients having laboratory values that are non-conclusive (unidentified microorganism report), patients who were died or discharged before isolation of the microorganism and initiation of treatment were excluded during study.

### Data collection

The data collection instrument was crafted through a comprehensive review of previous studies conducted across various contexts. It encompasses sociodemographic details, clinical features (encompassing laboratory tests and essential diagnostic assessments), treatment approaches (including medications and surgical procedures), and in-hospital results (comprising complications, duration of hospitalization, and discharge clinical condition).

Sociodemographic characteristics such as age, sex, residence and educational status, were recorded by interviewing patients. Clinical features, laboratory results, treatment modalities and treatment outcomes were collected from patients' medical chart.

### Specimen collection, handling, and transport

**Identification and antimicrobial susceptibility testing (AST).** Specimen obtained from the patients (Blood, Pus, Wound, Drainages, and Abscesses) by senior nurse until the swab became wet purulent discharge and for blood specimen 8-10 ml/bottle of blood were drawn bilaterally from both hands on the properly labelled two bottles. Within 2 hours of specimen collection, it was delivered to the microbiology laboratory then the samples were inoculated onto blood agar, Chocolate agar, and MacConkey agar. Then the plate was incubated for 18- 24 hours at 35-37°C MacConkey Agar Plate (MAP) aerobically and Blood Agar Plate (BAP) under CO<sub>2</sub>. If there was no growth after 18-24 hours of incubation, record the preliminary result & re-incubate BAP for additional 18-24 hours. When there was growth after 18-24 hours of incubation, a definitive biochemical identification and antimicrobial susceptibility test was performed. Standard operating procedures were followed in specimen collection and handling [12].

**Identification of bacteria.** Each specimen was inoculated onto MacConkey agar (MAC), mannitol salt agar (MAS), and blood agar plate (BAP), and chocolate agar plate (CAP) culture media. The media were incubated at 37 °C for 24 and 48 hours and aerobic conditions were maintained. For fastidious organisms, chocolate agar (heated 5% sheep's blood agar) was incubated at 37 °C for 24–48 hours in a 5–10% CO<sub>2</sub> atmosphere [12,13]. All plates were examined for bacterial growth after 24 hours and plates with no bacterial growth were reincubated for another 24 hours. After obtaining pure colonies, specific bacterial pathogens were identified by Gram stain, colony morphology, and a series of biochemical tests. Catalase, coagulase, optochin disk sensitivity, novobiocin, and bacitracin tests were conducted to identify gram-positive

bacteria. Biochemical tests such as lysine decarboxylase, citrate utilization, lactose fermentation, indole, urease, oxidase and satellitism tests were used to identify gram-negative bacteria.

**Antimicrobial susceptibility test.** Antimicrobial susceptibility test was carried out by using the Kirby Bauer (KB) disk diffusion method, then a standardized inoculum of the bacteria was swabbed onto the surface of a Mueller Hinton agar (MHA) plate. Three to five similar colonies were picked up with a wooden applicator stick and dipped into normal saline to make direct colony suspension of the isolates and inoculum was adjusted at 0.5 McFarland standard by using a densitometer.

The antibiotic susceptibility testing was done for Ampicillin (10µg), Amikacin (30µg), Ampicillin-sulbactam (10/10µg), Gentamicin (10µg), Ceftriaxone (30µg), Ciprofloxacin (5µg), Trimethoprim-Sulphamethoxazole(1.25/23.75µg), Ceftazidime (30 µg), Clindamycin, Cefepime (30 µg), Amoxicillin-Clavulanic acid (10µg), Meropenem (10 µg), Vancomycin, Cloxacillin, Cephalixin and Chloramphenicol. The plates were incubated at 37 °c for 24 hours under aerobic conditions and the diameter of inhibition zones was measured using a ruler and compared with the standard set by CLSI. Quality control of the susceptibility testing was assured by testing strains of *E. coli* ATCC 25922 for *Enterobacteriaceae*, *P. aeruginosa* ATCC 27853 Non- (*Enterobacteriaceae*), and Gram Positive *S.aureus* ATCC 25923 [14]. Multidrug resistance was considered if bacterial isolates were resistant to three or more antibiotics from different classes.

### Data quality control and management

The data collectors were tutored on the goal of the study, the parts of the questionnaires, their responsibility, and obligations. The questionnaire was translated from English to Amharic and afaan Oromo and back to English. Sociodemographic characteristics and clinical data were collected by residents and all specimens were collected following CLSI guidelines [12]. The sterility of culture media was ensured by incubating 5% of each batch of the prepared media at 37 °C for 24 hours. To preserve the quality of the results, physical changes including cracks, excess moisture, changes in color, and dehydration, were checked routinely. The incubator and refrigerator temperatures were monitored on a daily basis. The quality and performance of culture media and biochemical tests were checked using standard strains, such as *S. aureus* (ATCC 25923), *E. coli* (ATCC 25922), and *P. aeruginosa* (ATCC 27853).

### Data processing and analysis

The collected data were checked for completeness and entered into Epi data version 4.6. Then, the data were imported and analyzed using IBM SPSS software (Version 27:0; IBM SPSS Inc., New York, USA). A chi-square ( $\chi^2$ ) test was done to assess the associations between categorical variables. Descriptive statistical analysis was employed to provide an overview of the patients' baseline characteristics. A normality test was conducted using Shapiro-Wilk's W test for continuous data, and outcome variables were described with mean  $\pm$  standard deviation. Categorical variables were presented by frequency and percentage. Bivariate and multivariate logistics regression models were used to determine the presence of an association between independent and dependent variables. Variables with a P value <0.25 were candidates for stepwise multivariate analysis. In multivariate analysis, the adjusted odds ratio was used to measure the strength of association and variables with p-value <0.05 were considered statistically significant.

### Outcome measure and validating methods

The primary outcome of the present study was in-hospital treatment outcomes which were assessed by following the patient's clinical signs and symptoms and occurrence of complications until discharge. The treatment outcomes in this study were categorized as either fully recovered or treatment failure. Patients were classified as treatment failure if they exhibited local or systemic signs of infection, reinfection, disease progression, delayed wound healing, or complications requiring additional procedures after completing the initial treatment course. Conversely, patients were classified as fully recovered if none of these symptoms or complications were present upon completion of their treatment course. The treating physician confirmed in-hospital complications based on clinical findings and objective evidence like culture, ultrasound,

and X-ray imaging. Additionally, the treating physicians reviewed discharge summary notes and monitored patients daily from admission to discharge.

**Ethical consideration**

The study protocol was approved by the Institutional Review Board (IRB) of Jimma University, Institute of Health with a Ref. No IHRP1/1212/22. Approval was sought from the appropriate hospital authorities prior to interviewing the patients and extracting data from the patients’ charts. Furthermore, both written and verbal informed consent was obtained from all participants before initiating the data collection process. All the study protocols were performed in accordance with the ethical principles of the Declaration of Helsinki [15].

**Results**

**Participant’s enrollment information**

Throughout the study duration, a collective of 169 patients with MSKIs were recognized from the Orthopedics, Surgery, and Internal Medicine departments at JMC. Of these, nine patients were excluded, leaving 160 individuals who were enrolled, monitored, and incorporated into the analysis (Fig 1).

**Socio-demographic characteristics**

Among 160 patients with MSKIs included in the study, the majority 103(64.4%) of the participants were male. The mean ± SD age of patients was 33.51±13.56 years. About two-thirds (63.7%), of the patients were rural residents. Regarding educational status, 59(36.9%) of patients could not read and write, while farmers were common occupational status in 42(26.3%), followed by soldiers 28(17.5) (Table 1).

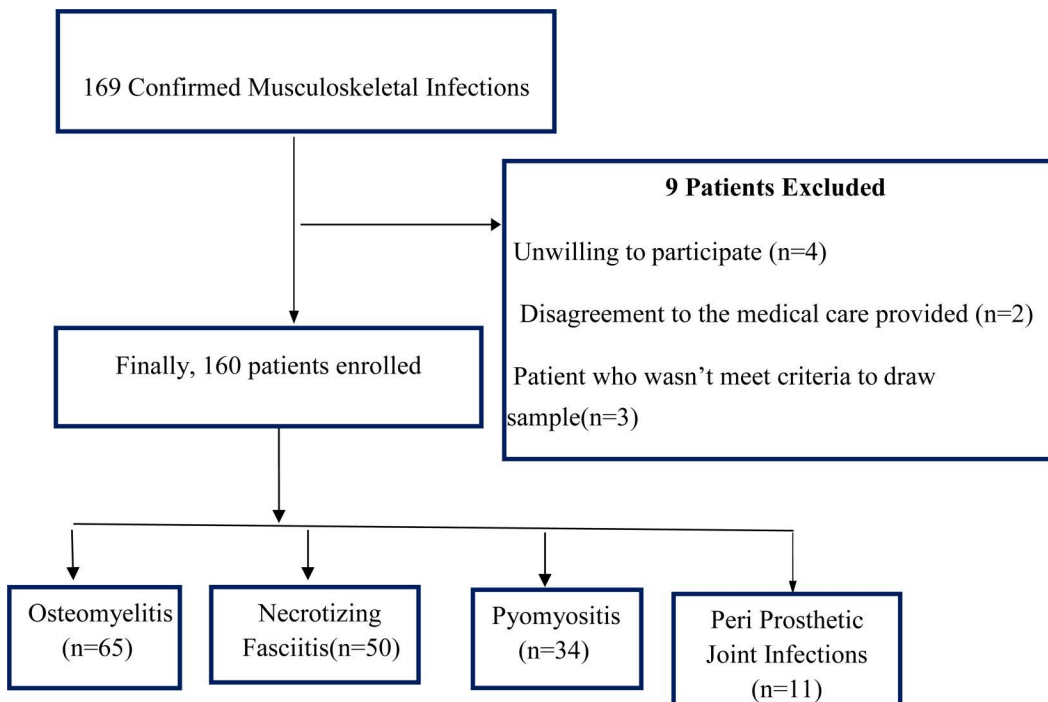

**Fig 1. Flow diagram of Participant enrollments.**

<https://doi.org/10.1371/journal.pone.0322471.g001>

**Table 1. Socio-demographic characteristics of patients with musculoskeletal infections admitted to JMC, July- December 2022.**

| Variables Category                        |                            | Types of Musculoskeletal infections |                             |                   |               | Total n (%) |
|-------------------------------------------|----------------------------|-------------------------------------|-----------------------------|-------------------|---------------|-------------|
|                                           |                            | OM n (%)                            | Necrotizing fasciitis n (%) | Pyomyositis n (%) | PJI n (%)     |             |
| Sex                                       | Male                       | 44(67.7)                            | 31(62)                      | 19(55.9)          | 9(81.8)       | 103(64.4)   |
|                                           | Female                     | 21(32.3)                            | 19(38)                      | 15(44.1)          | 2(18.2)       | 57(35.6)    |
| Body Mass Index (BMI)(Kg/m <sup>2</sup> ) | Underweight (Below 18.5)   | 9(13.8)                             | 6((12)                      | 3(8.82)           | 1(9.1)        | 19(11.9)    |
|                                           | Healthy Weight (18.5–24.9) | 48(73.9)                            | 41(82)                      | 24(70.59)         | 10(90.9)      | 123(76.9)   |
|                                           | Overweight (25.0–29.9)     | 8(12.3)                             | 3(6)                        | 7(20.59)          | –             | 18(11.3)    |
| Residence                                 | Rural                      | 26(40)                              | 14(28)                      | 12(35.3)          | 6(54.5)       | 102(63.7)   |
|                                           | Urban                      | 39(60)                              | 36(72)                      | 22(64.7)          | 5(45.5)       | 58(36.3)    |
| Educational background                    | Cannot Read and Write      | 18(27.7)                            | 26(52)                      | 11(32.4)          | 4(36.4)       | 59(36.9)    |
|                                           | Primary School             | 22(33.9)                            | 12(24)                      | 15(44.1)          | –             | 49(30.6)    |
|                                           | Secondary School           | 16(24.6)                            | 8(16)                       | 3(8.8)            | 2(18.2)       | 29(18.1)    |
|                                           | College and above          | 9(13.8)                             | 4(8)                        | 5(14.7)           | 5(45.4)       | 23(14.4)    |
| Occupation                                | Farmer                     | 10(15.4)                            | 16(32)                      | 7(20.6)           | 2(18.2)       | 42(26.3)    |
|                                           | Merchant                   | 9(13.9)                             | 4(8)                        | 2(5.9)            | –             | 15(9.4)     |
|                                           | Government employee        | 4(6.2)                              | 3(6)                        | 2(5.9)            | 1(9.1)        | 14(8.8)     |
|                                           | Housewife                  | 6(9.2)                              | 11(22)                      | 5(14.7)           | –             | 22(13.8)    |
|                                           | Laborer                    | 4(6.2)                              | 3(6)                        | 6(17.6)           | –             | 13(8.1)     |
|                                           | Driver                     | 7(10.7)                             | 3(6)                        | –                 | 1(9.1)        | 11(6.9)     |
|                                           | Non Gov.Employee           | 7(10.7)                             | 4(8)                        | 4(11.8)           | –             | 15(9.4)     |
|                                           | Soldier                    | 18(27.7)                            | 6(12)                       | 8(23.5)           | 7(63.3)       | 28(17.5)    |
| Age (Mean ±SD)                            |                            |                                     |                             |                   | 33.51 ± 13.56 |             |

<https://doi.org/10.1371/journal.pone.0322471.t001>

### Clinical features and related factors

On admission, all patients with MSKIs manifested localized signs and symptoms; swelling at the site of infection in 150(93.8%) and tenderness in 128(80%) were identified as a clinical presentation of the infections ([Table 2](#))

### Laboratory investigation and imaging-related factors

Complete blood count (CBC) was done for all patients on admission; of which leukocytosis and neutrophils were elevated in 106(66.3%) and 114(71.3%) of patients respectively. Similarly, C reactive protein was done for 69(43.1%) of patients, and the value was high in 63(91.3%), while Erythrocyte Sedimentation Rate in 141 (88.1%) and the value was high in 129(91.5%) of patients. Imaging results, x-ray in 150 (93.8%) and ultrasound in 80(50%) were also obtained as baseline diagnostic tools ([Table 3](#)).

### Bacterial profile and related factors

Culture was done for all patients with MSKIs and; microbial growth was identified in 94(58.8%) of the patients. Monomicrobial was a common microorganism profile identified in 71(75.7%) patients who had bacterial growth. *Staphylococcus aureus* 26(22.4%) was a main etiology isolated among patients with MSKIs followed by gram-negative etiologies *Escherichia coli* in 21(18.1%) and *Pseudomonas aeruginosa* in 17(14.7%) ([Table 4](#)).

### Antimicrobial susceptibility test-related factors

A susceptibility test was done for isolated microorganisms and reported that majority of isolated etiologies were resistant to Ceftriaxone 67(81.7%), Ceftazidime 47(61.8%) and Gentamicin 41 (46.5%) of test results. However,

**Table 2. Baseline clinical finding of the study participants who were diagnosed with MSKIs admitted to JMC, July- December 2022.**

| Variables                            | Category     | Frequency(n) | Percent (%) |
|--------------------------------------|--------------|--------------|-------------|
| Temperature on admission             | Hyperthermia | 96           | 60.0        |
|                                      | Normothermia | 58           | 36.3        |
|                                      | Hypothermia  | 6            | 3.8         |
| Localized signs and symptoms         | Yes          | 160          | 100.0       |
| Swelling                             | Yes          | 150          | 93.8        |
|                                      | No           | 10           | 6.3         |
| Tenderness                           | Yes          | 128          | 80.0        |
|                                      | No           | 32           | 20.0        |
| Warmth at the site                   | Yes          | 97           | 60.6        |
|                                      | No           | 63           | 39.4        |
| Erythema                             | Yes          | 114          | 71.3        |
|                                      | No           | 46           | 28.8        |
| Pain on admission                    | Yes          | 153          | 95.6        |
|                                      | No           | 7            | 4.4         |
| Difficulty in range of limb movement | Yes          | 153          | 95.6        |
|                                      | No           | 7            | 4.4         |
| Difficulty in weight-bearing         | Yes          | 141          | 88.1        |
|                                      | No           | 19           | 11.9        |
| Abscess formation                    | Yes          | 80           | 50.0        |
|                                      | No           | 80           | 50.0        |

<https://doi.org/10.1371/journal.pone.0322471.t002>

Clindamycin 6(20%) and Vancomycin 1(6.7%) were among the antibiotics with a low resistant profile in the setting (Table 5).

### Disease-related factors

**Types of musculoskeletal infections.** Osteomyelitis in 65 (40.6%), necrotizing fasciitis in 50 (31.3%), and Pyomyositis in 34(21.3%) were the predominant types of MSKIs identified among the studied participants (Fig 2).

**Anatomical locations affected by MSKIs.** The most commonly affected anatomical site was the tibia in 57(34.1%) of patients, followed by Femur in 49(29.3%) (Table 6).

### Risk factors of MSKIs

Trauma 93(58.1%), and comorbidities 82(51.2%) were the common risk of MSKIs in the study area. The mean  $\pm$  SD of symptom duration before the patient was admitted to the setting was  $32 \pm 53.70$  days. For patients who had comorbidities, diabetes mellitus 29(27.9%), cardiac disease 23(22.1%), and tuberculosis 14(13.5%) were the common comorbidities, almost one-fourth used immunosuppressive drugs (Table 7).

### Treatment-related factors

**Medical management of musculoskeletal infections.** Nearly all 158(98.8%) patients took antibiotics on their admission. Over one-fourth (25.9%) of patients who took antibiotics were treated with a monotherapy regimen. Ceftriaxone was a predominant antibiotic utilized as monotherapy in 37(23.4%) of patients; whereas Ceftriaxone plus metronidazole was a common combination of antibiotics in 50(42.4%) followed by Ceftriaxone plus Gentamicin in 28(23.7%) of patients. Almost all 157(98.1%) of patients took parenteral antibiotics and the majority 49(31.0%) of the patients were on parental antibiotics for five to six weeks.

**Table 3. Baseline laboratory and imaging findings among patients with MSKIs admitted to JMC, July- December 2022.**

| Variables                              | Category         | Frequency(n) | Percent (%) |
|----------------------------------------|------------------|--------------|-------------|
| CBC test on admission                  | Yes              | 160          | 100.0       |
|                                        | No               | –            | –           |
| White Blood Cell (cell/ mm3)           | High             | 106          | 66.3        |
|                                        | Normal           | 54           | 33.8        |
| Neutrophil (cell/ mm3)                 | High             | 114          | 71.3        |
|                                        | Normal           | 46           | 28.8        |
| Red Blood Cell (cell/ mm3)             | High             | 6            | 3.8         |
|                                        | Normal           | 102          | 63.8        |
|                                        | Low              | 52           | 32.5        |
| Hemoglobin (g/dl)                      | Normal           | 95           | 59.4        |
|                                        | Low              | 65           | 40.6        |
| Hematocrit (%)                         | Normal           | 96           | 60.0        |
|                                        | Low              | 64           | 40.0        |
| Mean Corpuscular Volume(pg/dl)         | High             | 5            | 3.1         |
|                                        | Normal           | 116          | 72.5        |
|                                        | Low              | 39           | 24.4        |
| Platelet (cell/ mm3)                   | Thrombocytosis   | 39           | 24.4        |
|                                        | Normal           | 99           | 61.9        |
|                                        | Thrombocytopenia | 22           | 13.8        |
| C reactive protein (mg/dl)             | Yes              | 69           | 43.1        |
|                                        | No               | 91           | 56.9        |
| Value of CRP                           | High             | 63           | 91.3        |
|                                        | Normal           | 6            | 8.7         |
| Erythrocyte Sedimentation Rate (mm/hr) | Yes              | 141          | 88.1        |
|                                        | No               | 19           | 11.9        |
| Value of ESR                           | High             | 129          | 91.5        |
|                                        | Normal           | 12           | 8.5         |
| Synovial Fluid Analysis                | Yes              | 11           | 6.9         |
|                                        | No               | 149          | 93.1        |
| Ultrasound                             | Yes              | 80           | 50.0        |
|                                        | No               | 80           | 50.0        |
| X-ray                                  | Yes              | 150          | 93.8        |
|                                        | No               | 10           | 6.3         |

<https://doi.org/10.1371/journal.pone.0322471.t003>

In sixty-nine (43.7%) patients, parenteral antibiotic was shifted to oral antibiotic. The majority of patients, 23(33.3%) switched PO antibiotics after 4 weeks of treatment. Ciprofloxacin 23 (33.8%) and Cloxacillin 12 (16.2%) were common PO antibiotics utilized among patients with MSKIs.

Additionally, antipain medications were considered for 139 (86.9%) of the patients. Tramadol 118 (50.2%) and Diclofenac 72(30.6%) were predominantly considered to treat pain for these patients ([Table 8](#)).

### Surgical management

One hundred forty-two (88.8%) of patients were undergone surgical interventions as treatment of these infections. surgical incision and drainage in 97 (40.2%) and debridement in (26.1%) were common surgical procedures performed for those patients ([Table 9](#)).

**Table 4. Distribution of microorganisms identified among participants who were diagnosed with MSKIs admitted to JMC, July- December 2022.**

| Variables                    | Category                                | Frequency(n) | Percent (%) |
|------------------------------|-----------------------------------------|--------------|-------------|
| Culture on Admission         | Yes                                     | 160          | 100.0       |
|                              | No                                      | –            | –           |
| Microbial Growth             | Yes                                     | 94           | 58.8        |
|                              | No                                      | 66           | 41.3        |
| Number of bacterial isolates | Monomicrobial                           | 71           | 75.5        |
|                              | Polymicrobial                           | 23           | 24.5        |
| Bacterial profiles           | <i>Staphylococcus aureus</i>            | 26           | 22.4        |
|                              | <i>Klebsiella pneumonia</i>             | 13           | 11.2        |
|                              | <i>Pseudomonas aeruginosa</i>           | 17           | 14.7        |
|                              | <i>Escherichia coli</i>                 | 21           | 18.1        |
|                              | Coagulase Negative Staphylococci (CoNS) | 6            | 5.2         |
|                              | <i>Proteus Mirabilis</i>                | 11           | 9.5         |
|                              | <i>Citrobacter Species</i>              | 10           | 8.6         |
|                              | <i>Enterococcus. Species</i>            | 3            | 2.6         |
|                              | <i>Enterobacter species</i>             | 3            | 2.6         |
|                              | Others*                                 | 6            | 5.2         |

\*Others: *Streptococcus Pneumoniae*, *Acinetobacter Species*, *Proteus Vulgaris*, and *Salmonella Species*

<https://doi.org/10.1371/journal.pone.0322471.t004>

**Treatment outcomes.** Treatment failure was observed in 75 (46.9%) of the patients treated for MSKIs in the setting (Fig 3).

**In-hospital complications of musculoskeletal infections.** Of the enrolled participants, 75 (46.9%) of the patients had developed at least one in-hospital complication during the study. the most common types of complications were: systemic infections (27.2%), deep vein thrombosis (25%), and abscesses (19.6%) were the most common in-hospital complications identified among these patients (Fig 4).

**Factors associated with MSKIs treatment outcomes.** Out of 160 patients treated for MSKIs, 75 (46.9) patients had experienced treatment failure. On multivariate logistic regressions male sex [AOR=2.56, 95%CI (1.07–6.23), P=0.034], having of microbial growth [AOR=3.03, 95%CI (1.31–6.97), P=0.009], ceftriaxone resistance [AOR=4.46, 95%CI (1.06–18.67), P=0.040], having co-morbidities [AOR=2.32, 95%CI(1.007–5.36), P=0.048], and Presence of complication [AOR=2.80, 95%CI (1.26–6.20), P=0.011] were predictors of treatment failure; whereas switching of antibiotics [AOR=0.30, 95%CI (0.13–0.67), P=0.004] and having surgical interventions [AOR=0.09, 95%CI (0.01–0.44), P=0.003] were protective against treatment failure (Table 10).

## Discussions

This study assessed the bacterial profile, drug susceptibilities, management, treatment outcomes, and its determinants among patients with musculoskeletal infections.

The current study reported that *S. aureus* was the most commonly isolated organism in the setting, followed by gram-negative etiologies *Escherichia coli* (18.1%) and *Pseudomonas aeruginosa* (14.7%). This finding is similar to other existing literatures conducted in Sweden [16], USA(17), South Africa [5], India [17], Nigeria [18] and Republic of China [19]. However, different finding was reported from Republic of China [20], and two studies from France [21,22]. The difference might be due to variations in geographical location, anatomical site, and comorbidity (in the study of China, patients with sepsis fungal etiology are common and in study of France, patients diagnosed with peripheral neuropathy and peripheral arterial disease, also *Streptococcus species* are common).

Table 5. Antimicrobial susceptibility patterns of isolates identified from patients presented with musculoskeletal infections admitted to JMC, July- December 2022.

| Bacterial Isolate       | Total | Patterns | Antimicrobial agents tested |              |              |              |              |              |              |              |              |              |              |              |              |              |
|-------------------------|-------|----------|-----------------------------|--------------|--------------|--------------|--------------|--------------|--------------|--------------|--------------|--------------|--------------|--------------|--------------|--------------|
|                         |       |          | AMP<br>f (%)                | AMC<br>f (%) | CEF<br>f (%) | CAZ<br>f (%) | CAF<br>f (%) | CIP<br>f (%) | CLI<br>f (%) | ERY<br>f (%) | GEN<br>f (%) | MER<br>f (%) | PEN<br>f (%) | PIP<br>f (%) | TMX<br>f (%) | VAN<br>f (%) |
| <i>S.aureus</i>         | 26    | S        | 1(20)                       | —            | 1(10)        | 1(14.3)      | 8(88.9)      | 10(50)       | 16(72.7)     | 8(34.8)      | 10(71.43)    | 5(71.4)      | 3(42.86)     | 5(29.4)      | 10(100)      |              |
|                         |       | I        | —                           | 1(16.7)      | —            | —            | —            | 4(20)        | 1(4.6)       | 7(30.4)      | 1(7.14)      | —            | 2(28.57)     | 2(11.8)      | —            |              |
| <i>K. pneumonia</i>     | 13    | R        | 4(80)                       | 5(83.3)      | 9(90)        | 6(85.7)      | 1(11.1)      | 6(30)        | 5(22.7)      | 8(34.8)      | 3(21.43)     | 2(28.6)      | 2(28.57)     | 10(58.8)     | —            |              |
|                         |       | S        | 1(14.3)                     | 1(10)        | 2(15.38)     | 2(18.2)      | 2(22.2)      | —            | —            | —            | 4(36.4)      | 7(70)        | —            | 9(81.8)      | 1(12.5)      |              |
| <i>P.aeruginosa</i>     | 17    | I        | —                           | 4(40)        | —            | —            | —            | 6(66.7)      | —            | —            | —            | —            | —            | —            | —            |              |
|                         |       | R        | 6(85.7)                     | 5(50)        | 11(84.62)    | 9(81.8)      | 7(77.8)      | 3(33.3)      | —            | —            | 7(63.6)      | 3(30)        | 2(100)       | 2(18.2)      | 7(87.5)      |              |
| <i>E. coli</i>          | 21    | S        | —                           | 2(28.57)     | 3(25)        | 9(56.25)     | 3(33.3)      | 6(42.86)     | 2(66.7)      | —            | 4(30.77)     | 12(75)       | —            | 5(35.72)     | 9(52.9)      |              |
|                         |       | I        | —                           | 3(42.86)     | —            | 5(31.25)     | 4(44.5)      | 1(7.14)      | —            | —            | 3(23.08)     | —            | —            | 8(57.14)     | 1(5.9)       |              |
| CoNS                    | 6     | R        | 2(100)                      | 2(28.57)     | 9(75)        | 2(12.5)      | 2(22.2)      | 7(50)        | 1(33.3)      | —            | 6(46.15)     | 4(25)        | —            | 1(7.14)      | 7(41.2)      |              |
|                         |       | S        | —                           | 7(50)        | 7(38.9)      | 3(18.75)     | 11(78.57)    | 3(18.75)     | —            | —            | 10(47.62)    | 16(88.9)     | —            | 11(61.1)     | 2(13.3)      |              |
| <i>P.mirabilis</i>      | 11    | I        | —                           | 5(35.7)      | —            | 3(18.75)     | —            | 3(18.75)     | —            | —            | —            | —            | —            | 3(16.7)      | —            |              |
|                         |       | R        | 15(100)                     | 2(14.3)      | 11(61.1)     | 10(62.5)     | 3(21.43)     | 10(62.5)     | —            | —            | 11(52.38)    | 2(11.1)      | —            | 4(22.2)      | 13(86.7)     |              |
| <i>Citrobacter Sp.</i>  | 10    | S        | 1(16.7)                     | 2(50)        | —            | 1(16.7)      | —            | 2(40)        | 2(100)       | 2(66.7)      | 3(50)        | 4(66.7)      | 2(33.3)      | 3(60)        | 2(100)       |              |
|                         |       | I        | 1(16.7)                     | —            | —            | 2(33.3)      | —            | 2(40)        | —            | —            | 1(33.3)      | —            | —            | —            | —            |              |
| <i>Enterococcus Sp.</i> | 3     | R        | 4(66.6)                     | 2(50)        | 5(100)       | 3(50)        | —            | 1(20)        | —            | —            | 3(50)        | 2(33.3)      | 4(66.7)      | 2(40)        | —            |              |
|                         |       | S        | —                           | 1(14.2)      | 1(10)        | 2(25)        | 5(45.5)      | 1(12.5)      | —            | —            | 3(33.3)      | 9(81.8)      | —            | 5(55.6)      | 2(22.2)      |              |
| <i>Enterobacter sp.</i> | 3     | I        | —                           | 3(42.9)      | —            | —            | —            | 1(12.5)      | —            | —            | 2(22.2)      | —            | —            | 2(22.2)      | —            |              |
|                         |       | R        | 9(100)                      | 3(42.9)      | 9(90)        | 6(75)        | 6(54.5)      | 6(75)        | —            | —            | 4(44.5)      | 2(18.2)      | —            | 2(22.2)      | 7(77.8)      |              |
| <i>Enterobacter sp.</i> | 3     | S        | —                           | 1(12.5)      | 1(12.5)      | 1(14.3)      | 4(50)        | 1(12.5)      | —            | —            | 3(33.3)      | 8(80)        | —            | 4(50)        | 1(14.3)      |              |
|                         |       | I        | —                           | 4(50)        | —            | —            | —            | 1(12.5)      | —            | —            | 1(11.1)      | —            | —            | 3(37.5)      | —            |              |
| <i>Enterobacter sp.</i> | 3     | R        | 7(100)                      | 3(37.5)      | 7(87.5)      | 6(85.7)      | 4(50)        | 6(75)        | —            | —            | 5(55.6)      | 2(20)        | —            | 1(12.5)      | 6(85.7)      |              |
|                         |       | S        | —                           | 1(50)        | —            | —            | 2(66.7)      | 1(33.3)      | 3(100)       | 2(100)       | 2(66.7)      | —            | 1(33.3)      | —            | 2(66.7)      |              |
| <i>Enterobacter sp.</i> | 3     | I        | —                           | —            | —            | —            | —            | —            | —            | —            | —            | —            | —            | —            | —            |              |
|                         |       | R        | —                           | 1(50)        | 3(100)       | 3(100)       | 1(33.3)      | 2(66.7)      | —            | —            | 1(33.3)      | 3(100)       | 2(66.7)      | 3(100)       | 1(33.3)      |              |
| <i>Enterobacter sp.</i> | 3     | S        | —                           | —            | —            | 1(33.3)      | 2(66.7)      | —            | —            | —            | 1(33.3)      | 3(100)       | —            | 1(50)        | —            |              |
|                         |       | I        | —                           | 2(66.7)      | —            | —            | 1(33.3)      | —            | —            | —            | —            | —            | —            | 1(50)        | —            |              |
| <i>Enterobacter sp.</i> | 3     | R        | —                           | 1(33.3)      | 3(100)       | 2(66.7)      | —            | 2(100)       | —            | —            | 2(66.7)      | —            | —            | 3(100)       | —            |              |
|                         |       | S        | —                           | —            | —            | —            | —            | —            | —            | —            | —            | —            | —            | —            | —            |              |

AMP: Ampicillin, AMC:Augmentin, CEF: Ceftriaxone, CAZ: Ceftazidime, CAF: Ciprofloxacin, CLI:Cilindamycin, ERY: Erythromycin, GEN: Gentamycin, MER: Meropenem, PEN: Penicillin, PIP: Piperacillin/tazobactam, TMX: Trimethoprim/sulfamethoxazole, VAN: Vancomycin

<https://doi.org/10.1371/journal.pone.0322471.t005>

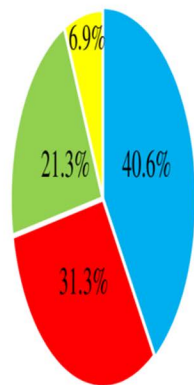

■ Osteomyelitis ■ Necrotizing fasciitis ■ Pyomyositis ■ Prosthetic joint infection

**Fig 2. Distributions of musculoskeletal infections type among patients with MSKIs admitted to JMC.**

<https://doi.org/10.1371/journal.pone.0322471.g002>

**Table 6. Anatomical location of musculoskeletal infection among participants admitted to JMC, July- December 2022.**

| Variables                         | Category | Frequency(n) | Percent (%) |
|-----------------------------------|----------|--------------|-------------|
| Anatomical area affected by MSKIs | Tibia    | 57           | 34.1        |
|                                   | Femur    | 49           | 29.3        |
|                                   | Elbow    | 14           | 8.4         |
|                                   | Humerus  | 12           | 7.2         |
|                                   | Foot     | 11           | 6.6         |
|                                   | Knee     | 10           | 6.0         |
|                                   | Ankle    | 9            | 5.4         |
|                                   | Hip      | 5            | 3.0         |

<https://doi.org/10.1371/journal.pone.0322471.t006>

The majority of isolated etiologies were resistant to Ceftriaxone (81.70%), Ceftazidime (61.8%) and Penicillins (77.1%). However, Clindamycin (20.0%) and Vancomycin (6.7%) were among the antibiotics with low resistant profiles in the setting. In contrast, study conducted in Germany [23], the antibiotic susceptibilities showed increasing rates of oxacillin-resistant *CoNS* (60.4%), piperacillin-tazobactam-resistant Gram-negative bacteria (26.5%), resistance of Gram-positive bacteria to vancomycin (<1%) and Gram-negative microorganisms to meropenem (1.25%).

Furthermore, Ceftriaxone was a predominant antibiotic utilized as monotherapy (23.4%); whereas Ceftriaxone plus metronidazole was a common combination of antibiotics (42.4%) followed by Ceftriaxone plus Gentamicin (23.7%) of patients. Ciprofloxacin (33.8%), Cloxacillin (16.2%), and Amoxicillin/Clavulanate (12.2%) were common PO antibiotics utilized. However, a study done in South Africa [5], the results of treatment show that the combinations of meropenem plus vancomycin and piperacillin-tazobactam plus amikacin plus vancomycin were used. In addition, oral combinations were co-amoxiclav plus ciprofloxacin (61%) and co- trimoxazole plus ciprofloxacin (61%). The reason for variation could be due to differences in isolated etiology and MSKIs type (only osteomyelitis was included in study of SA).

**Table 7. The risk factors of MSKIs among patients admitted to JMC, July- December 2022.**

| Variables                                  | Category                        | Frequency(n) | Percent (%) |
|--------------------------------------------|---------------------------------|--------------|-------------|
| Cause for MSKIs(n = 160)                   | Trauma                          | 93           | 58.1        |
|                                            | Hematogenous spread             | 67           | 41.9        |
| Symptom duration (Mean±SD)                 | 53.70 ± 32 days                 |              |             |
| Presence of Comorbidity (n = 160)          | Yes                             | 82           | 51.2        |
|                                            | No                              | 78           | 48.8        |
| Comorbidities Type (n = 104)               | Diabetes mellitus               | 29           | 27.9        |
|                                            | Cardiac Disease                 | 23           | 22.1        |
|                                            | HIV                             | 8            | 7.7         |
|                                            | Tuberculosis                    | 14           | 13.5        |
|                                            | Malnutrition                    | 11           | 10.6        |
|                                            | Cancer                          | 5            | 4.8         |
|                                            | Liver Disease                   | 8            | 7.7         |
|                                            | Chronic kidney disease          | 6            | 5.8         |
|                                            | Immune suppressive drug(n = 82) | Yes          | 23          |
| No                                         |                                 | 59           | 72.0        |
| Types of immune suppressive drug           | Chemotherapy Drugs              | 7            | 30.4        |
|                                            | Steroids                        | 16           | 69.6        |
| Antibiotic Exposure before admission       | Yes                             | 63           | 39.4        |
|                                            | No                              | 97           | 60.6        |
| Antibiotics Used Before admission (n = 83) | Ceftriaxone                     | 53           | 63.9        |
|                                            | Metronidazole                   | 19           | 22.9        |
|                                            | Cloxacillin                     | 5            | 6.0         |
|                                            | Ciprofloxacin                   | 6            | 7.2         |

<https://doi.org/10.1371/journal.pone.0322471.t007>

In the present study, (46.9%) of participants had treatment failure. The result agrees with a prior studies conducted in France 39% [22], India 37.5% (50), Latvia 47% [24], literature review on PJI in USA up to 50% [25] and South Africa 48% [26]. But, this finding was higher than previous studies done in India 23.3% [17], Switzerland 25.9% [27], South Africa 13% [26] and Canada 24.8% [28] respectively. Meanwhile, other studies from Nigeria [29] and Sudan [30] were reported a higher frequency of treatment failure outcomes 55% and 56.9% respectively, also in Minnesota 60% [31] compared to the present findings.

The variance in treatment outcome might be due to the presence of drug-resistant strains and late presentations of the patient for seeking medical care were higher in the present study. Besides, inclusion of a wide range of MSKIs types (but a study conducted in Sudan included only diabetic foot osteomyelitis and PJI in USA), prior antibiotic exposure before admission and the use of ceftriaxone in the majority of patients could also contribute to treatment failure in our study. The other possible explanation might be due to differences in the given treatment protocol from those studies and comorbidities (In the study of Nigeria, most of the patients had sickle cell anemia).

The identified predictor of treatment outcomes in this study are: being male, having microbiological growth, ceftriaxone resistance, presence of comorbidities, complications, antibiotics switching from IV to PO and surgical interventions.

Male patients were over twice more likely to develop treatment failures as compared to female patients. Our finding is consistent with a study conducted in Switzerland [27] and a systematic review and meta-analysis study done in the USA [32]. They state male patients were more likely to experience treatment failure than females. But another report from Switzerland revealed that being female is associated with poor clinical outcomes [33]. This could be due to patient characteristics (comorbidities, age, and occupations) or might be due to the majority of participants in most studies are male and difference in age of the studied population (in the study of Switzerland, participants were children). In fact, trauma is also a

**Table 8. Medication use characteristics among adult patients with MSKIs admitted to JMC, July- December 2022.**

| Variables                            | Category                                 | Frequency(n) | Percent (%) |
|--------------------------------------|------------------------------------------|--------------|-------------|
| Antibiotics on admission             | Yes                                      | 158          | 98.8        |
|                                      | No                                       | 2            | 1.3         |
| Number of antibiotics                | Monotherapy                              | 41           | 25.9        |
|                                      | Combination therapy                      | 117          | 74.1        |
| Initial Route of Drug Administration | Intravenous                              | 157          | 98.1        |
|                                      | PO                                       | 1            | 0.6         |
| Antibiotics Used                     | Ceftriaxone Monotherapy                  | 37           | 23.4        |
|                                      | Ceftriaxone + Metronidazole              | 50           | 42.4        |
|                                      | Ceftriaxone + Gentamicin                 | 28           | 23.7        |
|                                      | Ceftriaxone + Metronidazole + Gentamicin | 18           | 15.3        |
|                                      | Ceftazidime + Vancomycin                 | 12           | 10.2        |
|                                      | Ceftriaxone + Gentamicin + Clindamycin   | 10           | 8.5         |
| Duration of IV* antibiotics          | Less than 1 Week                         | 2            | 1.3         |
|                                      | For 1–2 Weeks                            | 35           | 22.2        |
|                                      | For 3–4 Weeks                            | 58           | 36.7        |
|                                      | For 5–6 Weeks                            | 49           | 31.0        |
|                                      | For 7–8 Weeks                            | 14           | 8.9         |
| Switched to PO** antibiotics         | Yes                                      | 69           | 43.7        |
|                                      | No                                       | 89           | 56.3        |
| Time taken to switch IV to PO**      | < 1 Week                                 | 1            | 1.4         |
|                                      | After 1 week of treatment                | 10           | 14.5        |
|                                      | After 2 weeks of treatment               | 13           | 18.8        |
|                                      | After 3 weeks of treatment               | 22           | 31.9        |
|                                      | After 4 weeks of treatment               | 23           | 33.3        |
| PO** antibiotics After Switching     | Ciprofloxacin                            | 25           | 33.8        |
|                                      | Cephalexin                               | 9            | 12.2        |
|                                      | Chloramphenicol                          | 8            | 10.8        |
|                                      | Amoxicillin/Clavulanate                  | 9            | 12.2        |
|                                      | Trimethoprim-sulfamethoxazole            | 8            | 10.8        |
|                                      | Cloxacillin                              | 12           | 16.2        |
|                                      | Others***                                | 3            | 4.2         |
| Anti-pains Used                      | Yes                                      | 139          | 86.9        |
|                                      | No                                       | 21           | 13.1        |
| Types of anti-pain medications       | Tramadol                                 | 118          | 50.2        |
|                                      | Morphine                                 | 31           | 13.2        |
|                                      | Pethidine                                | 1            | 0.4         |
|                                      | Diclofenac                               | 72           | 30.6        |
|                                      | Paracetamol                              | 13           | 5.5         |

(PO\*\*: per oral or by mouth, IV\*: Intravenous, Others\*\*\*: Metronidazole, Clindamycin, and Erythromycin)

<https://doi.org/10.1371/journal.pone.0322471.t008>

risk factor for MSKIs in the majority of male patients in the current study; as a result, they stay in the hospital for prolonged periods and are more prone to develop in hospital complications.

Having microbial growth on the culture result was also an independent predictor of treatment failure; patients with microbial growth had a threefold higher risk of treatment failure than patients without microbial growth. The current finding

**Table 9. Types of surgical procedures performed and length of hospital stay among adult patients with MSKIs admitted to JMC, July- December 2022.**

| Variables                    | Category                        | Frequency(n) | Percent (%) |
|------------------------------|---------------------------------|--------------|-------------|
| Surgical Intervention        | Yes                             | 142          | 88.8        |
|                              | No                              | 18           | 11.2        |
| Types of Surgical Procedures | Incision and drainage           | 97           | 40.2        |
|                              | Debridement of Infected Tissues | 63           | 26.1        |
|                              | Irrigation                      | 22           | 9.1         |
|                              | Sequestrectomy                  | 19           | 7.9         |
|                              | Removal of infected prostheses  | 11           | 4.6         |
|                              | Skin Grafting                   | 8            | 3.3         |
|                              | Amputation                      | 8            | 3.3         |
|                              | Arthrotomy                      | 7            | 2.9         |
|                              | Prosthetic Device Retention     | 6            | 2.5         |
| LOS(mean ± SD in days)       | 38.74 ± 13.17                   |              |             |

<https://doi.org/10.1371/journal.pone.0322471.t009>

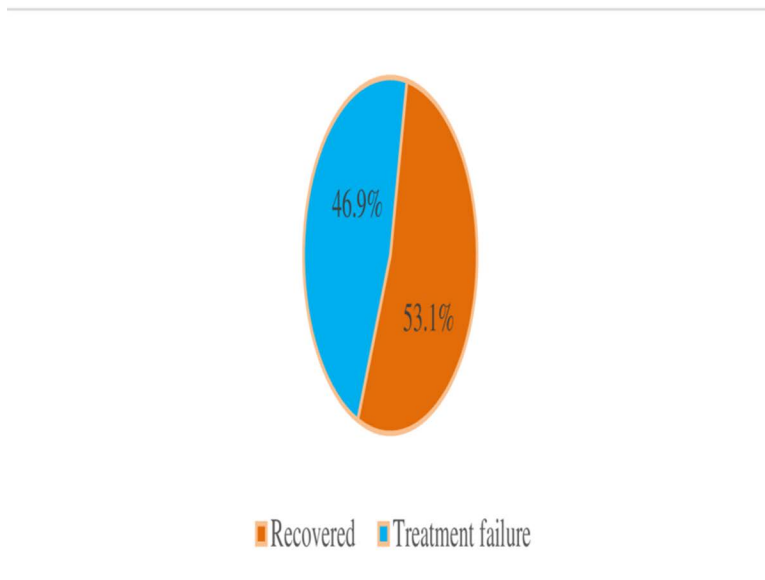

**Fig 3. Treatment outcomes of musculoskeletal infections among participants admitted to JMC.**

<https://doi.org/10.1371/journal.pone.0322471.g003>

was similar to the report of the studies conducted in England (38), India [27], Portugal [33], and France [22], which found that patients who had microbial growth had a high risk of treatment failures as compared to those who had no growth. However, it was inconsistent with the study conducted at Pennsylvania (patients who had no growth had a high risk of treatment failure as compared to those patients who had microbial growth) [34].

These discrepancies could be the association of treatment failure with microbial growth is infections caused by more virulent organisms, which are more difficult to treat than those have been caused by less virulent organisms. While a possible explanation for culture-negative treatment failure might be premature antimicrobial therapy before the culture test was obtained, variance in the infecting organism and differences in MSKIs types (only PJI) is included in the study of Pennsylvania.

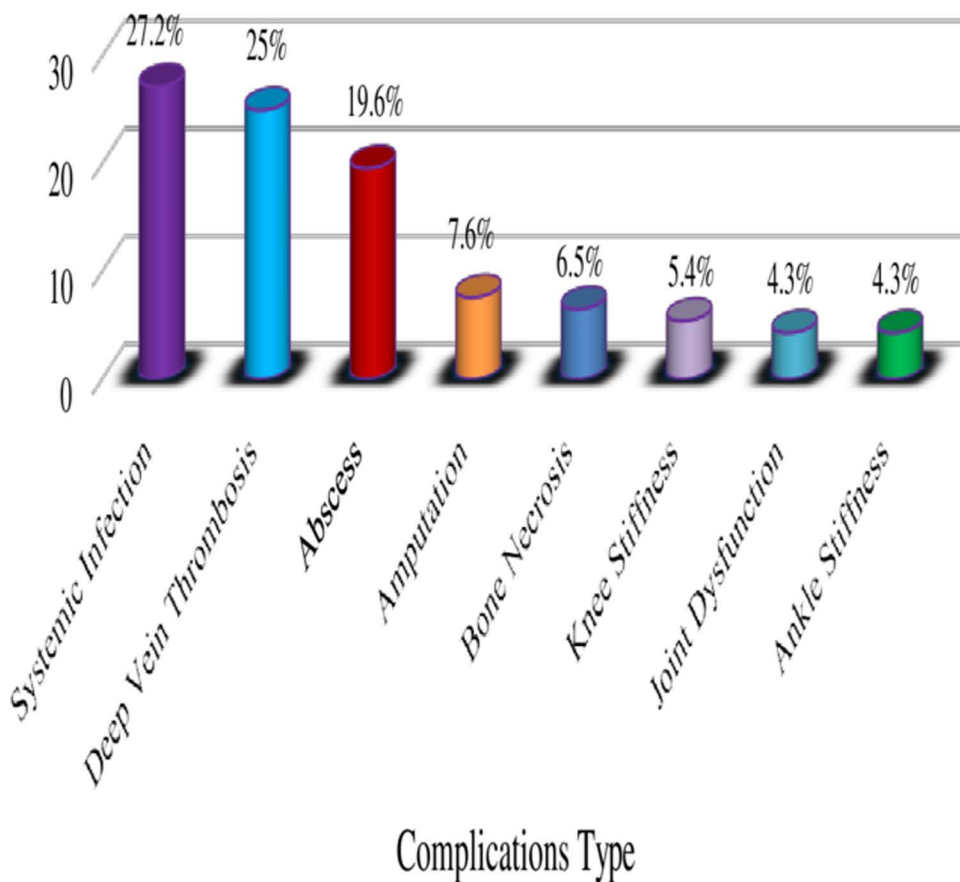

**Fig 4. Distributions of in-hospital complications among adult patients with MSKIs.**

<https://doi.org/10.1371/journal.pone.0322471.g004>

Similarly, ceftriaxone resistance was the other determinant of treatment failure. Patients who were resistant to ceftriaxone are at more than four times at risk of treatment failure than patients who were sensitive to ceftriaxone therapy. This was coherent with a study conducted in Ethiopia [35]. However, this finding was inconsistent with a study conducted in the USA [36]; the report states infections treated with ceftriaxone have a better-recovered outcome than vancomycin-treated infections. This inconsistency could be due to ceftriaxone sensitivity to most isolated etiologies in the study of USA and epidemiological antibiogram variation. While in our study, ceftriaxone was resistant to most of the identified etiologies. Also, differences in MSKIs type (only osteomyelitis is included in study of USA) might be a reason for the inconsistency.

Additionally, comorbidity was found to be an independent predictor of treatment failure in patients diagnosed with MSKIs. Patients with co-morbidity were about two times more likely to develop treatment failure than those without comorbid medical conditions. The current finding was supported by studies done in France [37], India [17], Spain [38], Switzerland [32], and India [39]. But, an opposing finding was reported from France [40], which states that no single comorbid condition was significantly associated with treatment failure outcomes. The discrepancy might be due to a difference in comorbidity types in France; the listed comorbidities are: neurological and/or psychiatric diseases, alcohol abuse, and fever. In other comparator studies, diabetes mellitus was the most common.

In this study, IV antibiotics switching and surgical interventions were protective against treatment failures among patients treated for MSKIs. Patients whose IV antibiotics were switched to PO antibiotics had seventy percent more likely to have recovered outcomes as compared to patients whose their antibiotics were not switched. The result is comparable

**Table 10. Bivariate and Multivariate Analysis of factors associated with treatment outcomes among patients with MSKIs admitted to JMC July-December 2022.**

| Variables              | Categories | Treatment outcomes      |                 | COR (95% CI)     | p-value | AOR (95%) CI     | P-value       |
|------------------------|------------|-------------------------|-----------------|------------------|---------|------------------|---------------|
|                        |            | Treatment Failure n (%) | Recovered n (%) |                  |         |                  |               |
| Sex                    | Male       | 55(53.4)                | 48(46.6)        | 2.12(1.08-4.13)  | 0.027   | 2.56(1.07-6.23)  | <b>0.034*</b> |
|                        | Female     | 20(35.1)                | 37(64.9)        | 1                | –       | –                | –             |
| Microbial Growth       | Yes        | 56(59.6)                | 38(40.4)        | 3.64(1.86-7.15)  | 0.001   | 3.03(1.31-6.97)  | <b>0.009*</b> |
|                        | No         | 19(28.8)                | 47(71.2)        | 1                | –       | –                | –             |
| Home Residency         | Rural      | 56(54.9)                | 46(45.1)        | 2.49(0.42-7.9)   | 0.008   | 2.02(0.82-4.93)  | 0.122         |
|                        | Urban      | 19(32.8)                | 39(67.3)        | 1                | –       | –                | –             |
| Ceftriaxone resistance | Sensitive  | 5(33.3)                 | 10(66.7)        | 1                | –       | –                | –             |
|                        | Resistance | 45(67.2)                | 22(32.8)        | 4.09(1.24-13.42) | 0.020   | 4.46(1.06-18.67) | <b>0.040*</b> |
| Co-morbidity           | Yes        | 47(57.3)                | 35(42.7)        | 2.39(1.26-4.53)  | 0.007   | 2.32(1.007-5.36) | <b>0.048*</b> |
|                        | No         | 28(35.9)                | 50(64.1)        | 1                | –       | –                | –             |
| Diabetes mellitus      | Yes        | 21(72.4)                | 8(27.6)         | 3.74(1.54-9.07)  | 0.003   | 1.13(0.11-11.28) | 0.91          |
|                        | No         | 54(41.2)                | 77(58.8)        | 1                | –       | –                | –             |
| IV to PO Switching     | Yes        | 22(31)                  | 49(69)          | 0.30(0.15-0.59)  | 0.001   | 0.30(0.13-0.67)  | <b>0.004*</b> |
|                        | No         | 53(59.5)                | 36(40.5)        | 1                | –       | –                | –             |
| Surgical Intervention  | Yes        | 60(42.3)                | 82(57.7)        | 0.14(0.04-0.52)  | 0.003   | 0.09(0.01-0.44)  | <b>0.003*</b> |
|                        | No         | 15(83.3)                | 3(16.7)         | 1                | –       | –                | –             |
| Complication           | Yes        | 51(60)                  | 34(40)          | 3.18(1.66-6.11)  | 0.001   | 2.80(1.26-6.20)  | <b>0.011*</b> |
|                        | No         | 24(32)                  | 51(68)          | 1                | –       | –                | –             |

<https://doi.org/10.1371/journal.pone.0322471.t010>

to a previous study reported from USA revealed that an excellent outcome was seen after IV therapies were switched to oral antibiotic therapy [41]. In line with this, previous literatures conducted in Switzerland [32], England [42], and France [43] showed the non-inferiority of early oral step-down compared with prolonged IV therapies. However, it is contrary to study done USA; the finding showed treatment failure in the oral antibiotic group participants [44].

The inconsistency could be due to differences in MSKIs type studied, lower rate usage of timely surgical intervention with antibiotics, and variation in presence of comorbidities (most of the patients had peripheral osteomyelitis) in the USA report. But, in our study, variety types of MSKIs were included. And also, for the majority of our patients, surgical intervention was given with antibiotics.

Surgical intervention was another protective measure against treatment failures in MSKIs patients. Patients who underwent surgical procedures as treatment of MSKIs were about ninety percent more likely to have recovered treatment outcomes than patients who didn't undergo surgical interventions. This result was comparable with other studies done in Ethiopia [6], Spain [45], India [24] and Switzerland [32]. However, a previously conducted study in Switzerland [46]; partially agreed with the requirement for surgical intervention in the management of MSKIs due to differences in MSKIs type that need surgical intervention). On the other hand, a Study conducted in USA [47] revealed providing surgical procedure was associated with treatment failure. While other study which is conducted in China [48], there was no significant difference in recovery outcome between groups having surgical intervention and hadn't.

The possible explanation for the discrepancy might be due to differences in study population (In study of USA pediatrics are the studied participants), MSKIs type (only septic arthritis was included in study of China), the presence of comorbidity, and the presence of complications that requires surgical intervention. The observed recovered outcome for the present study could be on admission; half of the participants were presented with abscess, for which incision and drainage of the abscess were done, as well as debridement of infected tissues, irrigation, and removal of infected orthopedic prostheses were done. Those surgical interventions had a role in rapidly decreasing the bacterial load and avoiding potential complications.

In current study, patients who had treatment failures were developed at least one complication of musculoskeletal infections during their hospital stay. Systemic infection (27.2%), Deep vein thrombosis (25%), bone abscess (19.6%), amputation (7.6%), bone necrosis (6.5%), Knee Stiffness (5.4%), joint dysfunction (4.3%), and ankle stiffness (4.3%) were the identified in hospital complications type among patients with MSKIs. This finding was parallel to the report of studies conducted in Ethiopia [6] and South Africa [26]. While this pattern of complication was different from the results of the study conducted in Portugal (61), Ecuador [36], Brazil [49], and Thailand [49], which show the identified complications were arthrofibrosis, sepsis, pulmonary embolism, death, myositis, subluxation, pathological fracture and liver injury.

The inconsistency might be due to differences in etiology (fungal infections are cause of MSKIs) in Thailand, longer follow-up duration, presence of a large number of drugs susceptible microorganisms, difference in MSKIs risk factors and anatomical site involvement in Portugal, also differences in management protocol used at different institutions may have a role for the variation seen. But in our study, most of the identified etiology was resistant to the commonly used antibiotics in the setting, as well as due to short-term follow-up duration, long-term complications (i.e., Death) were not reported. Moreover, in low-income countries like Ethiopia, lack of equipment and materials necessary to maintain strict aseptic conditions and poor hygiene of patients could be a reason for high number of systemic infections.

The mean  $\pm$  SD length of hospital stay for the present study was  $38.74 \pm 13.17$  days. This result was comparable to the findings of a study conducted in Tunisia that showed hospital stays of

38.4 days [50]. But, it was higher than the hospital stays in the UK (30), France [51], China [52], Kazakhstan [53] and India [54], which were 13, 21, 8.3, 17.5, and 26.9 days, respectively. The reason for longer hospital stays might be due to the presence of microorganisms that are associated with treatment failure. In addition, for most of our study participants, the cause of their MSKIs was trauma, especially bullet injury and road traffic accidents, since it may take them a longer period to heal. Moreover, 46.9% of enrolled patients develop in-hospital complications, and the majority of patients underwent surgical intervention, which may be a reason for prolonged hospitalization.

## Conclusion

This study highlights the significant burden of musculoskeletal infections (MSKIs) among adult patients at Jimma Medical Center, Ethiopia, with nearly half of the patients experiencing treatment failure. *Staphylococcus aureus* emerged as the most prevalent bacterial pathogen, demonstrating high resistance to commonly used antibiotics such as ceftriaxone. The findings underscore the critical importance of timely and appropriate management strategies, including the early transition from parenteral to oral antibiotics and prompt surgical interventions, which were shown to significantly improve treatment outcomes. Factors such as male sex, microbial growth, ceftriaxone resistance, comorbidities, and complications were identified as key predictors of treatment failure, while surgical intervention and antibiotic switching were protective against poor outcomes. These insights emphasize the need for tailored treatment protocols, enhanced antimicrobial stewardship, and improved infection control measures to address the growing challenge of antimicrobial resistance and optimize patient care in resource-limited settings. Future research should focus on longitudinal studies to further explore the long-term outcomes and cost-effectiveness of these interventions in similar contexts.

## Acknowledgments

We extend our gratitude to Jimma University, the data collectors, and all the participants in the study.

## Author contributions

**Conceptualization:** Mekonnen Mamo, Desalegn Gizaw, Gorfineh Teshome, Aster Wakjira.

**Data curation:** Mekonnen Mamo, Desalegn Gizaw, Kisi Chemedda, Aster Wakjira.

**Formal analysis:** Mekonnen Mamo, Desalegn Gizaw, Gorfineh Teshome, Aster Wakjira.

**Investigation:** Gorfineh Teshome.

**Methodology:** Mekonnen Mamo, Desalegn Gizaw, Kisi Chemed.

**Software:** Mekonnen Mamo, Aster Wakjira.

**Supervision:** Mekonnen Mamo, Kisi Chemed.

**Validation:** Mekonnen Mamo, Desalegn Gizaw, Aster Wakjira.

**Visualization:** Desalegn Gizaw, Kisi Chemed.

**Writing – original draft:** Mekonnen Mamo, Desalegn Gizaw, Gorfineh Teshome.

**Writing – review & editing:** Mekonnen Mamo, Desalegn Gizaw, Gorfineh Teshome, Aster Wakjira.

## References

1. Chauvelot P, Ferry T, Tafani V, Diot A, Tasse J, Conrad A, et al. Bone and joint infection involving *Corynebacterium* spp.: from clinical features to pathophysiological pathways. *Front Med*. 2021;7:539501.
2. Howell A, Parker S, Tsitskaris K, Oddy M. The burden of bone, native joint and soft tissue infections on orthopaedic emergency referrals in a city hospital. *Ann R Coll Surg Engl*. 2016;98:34–39. <https://doi.org/10.1308/rcsann.2015.0050> PMID: [26688397](https://pubmed.ncbi.nlm.nih.gov/26688397/)
3. Malizos KN. Global forum: the burden of bone and joint infections: a growing demand for more resources. *J Bone Joint Surg Am*. 2017;99(5):e20. <https://doi.org/10.2106/JBJS.16.00240> PMID: [28244919](https://pubmed.ncbi.nlm.nih.gov/28244919/)
4. Malizos K, Kirketerp-Møller K. Incidence and socioeconomic impact of Bone and Joint Infections (BJIs): the European perspective. In: *Periprosthetic joint infections: changing paradigms*. Springer; 2016. pp. 3–18.
5. Ferreira N, Reddy K, Venter R, Centner C, Laubscher M. Antibigram profiles and efficacy of antibiotic regimens of bacterial isolates from chronic osteomyelitis of the appendicular skeleton: a developing-world perspective. *S Afr Med J*. 2021;111(17):642–8. <https://doi.org/10.7196/SAMJ.2021.v111i7.15516> PMID: [34382547](https://pubmed.ncbi.nlm.nih.gov/34382547/)
6. Mamo MD, Daba FB, Beshir M, Fanta K. Treatment and clinical outcomes of osteoarticular infections among pediatrics admitted to Jimma University Medical Center, Ethiopia: a prospective observational study. *Infect Drug Resist*. 2021;2933–41.
7. Fernandez JM, Dobrick JB, Jadavji A, Adam RD. *Staphylococcus aureus* bacteremia at a referral medical center in Kenya: a retrospective review of cases from 2010 to 2018. *PLoS One*. 2020;15:e0234914. <https://doi.org/10.1371/journal.pone.0234914> PMID: [32574220](https://pubmed.ncbi.nlm.nih.gov/32574220/)
8. Mezemir R, Seid A, Gishu T, Demas T, Gize A. Prevalence and root causes of surgical site infections at an academic trauma and burn center in Ethiopia: a cross-sectional study. *Patient Saf Surg*. 2020;14:1–7. PMID: [31921353](https://pubmed.ncbi.nlm.nih.gov/31921353/)
9. Mdingi VS, Maré PH, Marais LC. Factors associated with dissemination and complications of acute bone and joint infections in children. *SA Orthop J*. 2023;22:34–40.
10. Biruk W, Wubshet K. Chronic osteomyelitis at Tikur Anbessa Hospital, Addis Ababa University, Ethiopia. *East Cent Afr J Surg*. 2007;12:33–41.
11. Misha G, Chelkeba L, Melaku T. Bacterial profile and antimicrobial susceptibility patterns of isolates among patients diagnosed with surgical site infection at a tertiary teaching hospital in Ethiopia: a prospective cohort study. *Ann Clin Microbiol Antimicrob*. 2021;20(1):1–10. <https://doi.org/10.1186/s12941-021-00440-z> PMID: [33971896](https://pubmed.ncbi.nlm.nih.gov/33971896/)
12. Wayne P. Clinical and laboratory standards institute. Performance standards for antimicrobial susceptibility testing. 2011.
13. Sader HS, Mendes RE, Kimbrough JH, Kantro V, Castanheira M. Impact of the recent clinical and laboratory standards institute breakpoint changes on the antimicrobial spectrum of aminoglycosides and the activity of plazomicin against multidrug-resistant and carbapenem-resistant Enterobacterales from United States Medical Centers. *Oxford University Press US*; 2023. p. ofad058.
14. Pathak K, Sen S. Implementing the updated guidelines in routine clinical microbiology reporting. *Infect Drug Resist*. 2022;1945–6.
15. Shrestha B, Dunn L. The declaration of Helsinki on medical research involving human subjects: a review of seventh revision. 2019.
16. Wallander K, Jorup-Rönström C, Ullberg M, Törnblom I, Ottosson C, Giske CG. Etiology of bone and joint infections: a case series of 363 consecutive patients from an orthopaedic infection unit. *Infect Dis*. 2016;48: 618–25.
17. Banerjee B, Shaw T, Mukhopadhyay C, Bhat N S, Singh BMK. Epidemiology, resistance characteristics, virulence determinants, and treatment outcomes of *Staphylococcus aureus* bone and joint infections: a one-year prospective study at a tertiary care hospital in India. *Pathog Glob Health*. 2020;114:482–6. <https://doi.org/10.1080/20477724.2020.1823108> PMID: [32960738](https://pubmed.ncbi.nlm.nih.gov/32960738/)
18. Anyaehie U, Lasebikan O, Orikpe I, Eze K, Ikpegbu T. Aetiology and pattern of bone and joint infection presenting at a regional orthopaedic hospital. *Niger J Med*. 2017;26:128–31.
19. Li Y, Zhou Q, Liu Y, Chen W, Li J, Yuan Z, et al. Delayed treatment of septic arthritis in the neonate: a review of 52 cases. *Medicine (Baltimore)*. 2016;95:e5682. <https://doi.org/10.1097/MD.0000000000005682> PMID: [28002339](https://pubmed.ncbi.nlm.nih.gov/28002339/)
20. Zhang J, Li X, Huang G, Wang A, Zhang F. Clinical features and etiology of musculoskeletal infection with or without sepsis in the emergency department *Int J Gen Med*. 2021;3511–6.

21. Martin A, Loubet P, Salipante F, Laffont-Lozes P, Mazet J, Lavigne J-P, et al. Clinical features and outcomes of Enterococcal bone and joint infections and factors associated with treatment failure over a 13-year period in a French teaching hospital. *Microorganisms*. 2023;11:1213.
22. Seng P, Vernier M, Gay A, Pinelli P-O, Legré R, Stein A. Clinical features and outcome of bone and joint infections with streptococcal involvement: 5-year experience of interregional reference centres in the south of France. *New Microbes New Infect*. 2016;12:8–17. <https://doi.org/10.1016/j.nmni.2016.03.009> PMID: [27222712](https://pubmed.ncbi.nlm.nih.gov/27222712/)
23. Fröschen FS, Randau TM, Franz A, Molitor E, Hoerauf A, Hischebeth GTR. Microbiological trends and antibiotic susceptibility patterns in patients with periprosthetic joint infection of the hip or knee over 6 years. *Antibiotics*. 2022;11:1244.
24. Petruhina J, Urbane UN, Petersons A, Pavare J. Epidemiology and antibacterial treatment of acute hematogenous osteomyelitis in patients hospitalized at children's clinical University Hospital in Riga, Latvia. *Acta Chir Latv*. 2017;17:29–34.
25. Ricciardi BF, Muthukrishnan G, Masters EA, Kaplan N, Daiss JL, Schwarz EM. New developments and future challenges in prevention, diagnosis, and treatment of prosthetic joint infection. *J Orthop Res*. 2020;38:1423–35.
26. Horn A, Wever S, Hoffman E. Complications following acute severe haematogenous osteomyelitis of the long bones in children. *SA Orthop J*. 2019;18:23–29.
27. Pham T-T, Andrey DO, Stampf S, Burkhard SH, Hirzel C, Tschopp J, et al. Epidemiology and outcomes of bone and joint infections in solid organ transplant recipients. *Am J Transplant*. 2022;22:3031–46.
28. Kandel CE, Jenkinson R, Daneman N, Backstein D, Hansen BE, Muller MP, et al. Predictors of treatment failure for hip and knee prosthetic joint infections in the setting of 1-and 2-stage exchange arthroplasty: a multicenter retrospective cohort. Oxford University Press US; 2019. p. ofz452.
29. Ebong WW. Acute osteomyelitis in Nigerians with sickle cell disease. *Ann Rheum Dis*. 1986;45:911–5. <https://doi.org/10.1136/ard.45.11.911> PMID: [3789826](https://pubmed.ncbi.nlm.nih.gov/3789826/)
30. El Bushra A Diabetic septic foot lesions in El Obeid, Western Sudan. *Sudan J Med Sci*. 2007;2:119–22.
31. Marculescu C, Berbari E, Hanssen A, Steckelberg J, Harmsen S, Mandrekar J, et al. Outcome of prosthetic joint infections treated with debridement and retention of components. *Clin Infect Dis*. 2006;42:471–8. PMID: [16421790](https://pubmed.ncbi.nlm.nih.gov/16421790/)
32. Choong AL, Shadbolt C, Choong E, Spelman T, Muñoz-Mahamud E, Lora-Tamayo J, et al. The impact of sex on the outcomes of prosthetic joint infection treatment with debridement, antibiotics and implant retention: a systematic review and individual patient data meta-analysis. *JAAOS Glob Res Rev*. 2022;6: e22.
33. Manz N, Krieg AH, Buettcher M, Ritz N, Heining U. Long-term outcomes of acute osteoarticular infections in children. *Front Pediatr*. 2020;8:587740. <https://doi.org/10.3389/fped.2020.587740> PMID: [33335875](https://pubmed.ncbi.nlm.nih.gov/33335875/)
34. Tan TL, Kheir MM, Shohat N, Tan DD, Kheir M, Chen C, et al. Culture-negative periprosthetic joint infection: an update on what to expect. *JBJS Open Access*. 2018;3:e0060. <https://doi.org/10.2106/JBJS.OA.17.00060> PMID: [30533595](https://pubmed.ncbi.nlm.nih.gov/30533595/)
35. Misha G, Chelkeba L, Melaku T. Incidence, risk factors and outcomes of surgical site infections among patients admitted to Jimma Medical Center, South West Ethiopia: prospective cohort study. *Ann Med Surg*. 2021;65:102247. <https://doi.org/10.1016/j.amsu.2021.102247> PMID: [33898031](https://pubmed.ncbi.nlm.nih.gov/33898031/)
36. Tice AD, Hoaglund PA, Shoultz DA. Risk factors and treatment outcomes in osteomyelitis. *J Antimicrob Chemother*. 2003;51:1261–8. <https://doi.org/10.1093/jac/dkg186> PMID: [12668581](https://pubmed.ncbi.nlm.nih.gov/12668581/)
37. Lemaigen A, Bernard L, Marmor S, Ferry T, Grammatico-Guillon L, Astagneau P, et al. Epidemiology of complex bone and joint infections in France using a national registry: The CRIOAc network. *J Infect*. 2021;82:199–206. PMID: [33352213](https://pubmed.ncbi.nlm.nih.gov/33352213/)
38. Murillo O, Grau I, Lora-Tamayo J, Gomez-Junyent J, Ribera A, Tubau F, et al. The changing epidemiology of bacteraemic osteoarticular infections in the early 21st century. *Clin Microbiol Infect*. 2015;21:254-e1. PMID: [25618436](https://pubmed.ncbi.nlm.nih.gov/25618436/)
39. Banerjee B, Bhat SS, Mukhopadhyay C, Bhat AK. Microbiological evaluation of osteomyelitis with a special reference to antibiotic sensitivity pattern of isolates from a tertiary care hospital. *J Pure Appl Microbiol*. 2020;14(1):485. <https://doi.org/10.22207/jpam.14.1.50>
40. Roger P-M, Cua E, Courjon J, Landraud L, Carles M, Bernard E. The impact of bacteremia on the outcome of bone infections. *Médecine Mal Infect*. 2014;44:380–6. <https://doi.org/10.1016/j.medmal.2014.07.013> PMID: [25169941](https://pubmed.ncbi.nlm.nih.gov/25169941/)
41. Halouska MA, Van Roy ZA, Lang AN, Hilbers J, Hewlett AL, Cortes-Penfield NW. Excellent outcomes with the selective use of oral antibiotic therapy for bone and joint infections: a single-center experience. *Cureus*. 2022;14:e26982. <https://doi.org/10.7759/cureus.26982> PMID: [35989847](https://pubmed.ncbi.nlm.nih.gov/35989847/)
42. Li H-K, Rombach I, Zambellas R, Walker AS, McNally MA, Atkins BL, et al. Oral versus intravenous antibiotics for bone and joint infection. *N Engl J Med*. 2019;380:425–36. <https://doi.org/10.1056/NEJMoa1710926> PMID: [30699315](https://pubmed.ncbi.nlm.nih.gov/30699315/)
43. Boclé H, Lavigne J-P, Cellier N, Crouzet J, Kouyoumdjian P, Sotto A, et al. Effectiveness of early switching from intravenous to oral antibiotic therapy in *Staphylococcus aureus* prosthetic bone and joint or orthopedic metalware-associated infections. *BMC Musculoskelet Disord*. 2021;22:1–7.
44. Suzuki H, Mosher HJ, Heintz BH, Livorsi DJ. Implementation of a consensus protocol for antibiotic use for bone and joint infection to reduce unnecessary outpatient parenteral antimicrobial therapy: a quality improvement initiative. *Antimicrob Steward Healthc Epidemiol*. 2022;2:e6.
45. Garcia del Pozo E, Collazos J, Carton J, Camporro D, Asensi V. Factors predictive of relapse in adult bacterial osteomyelitis of long bones. *BMC Infect Dis*. 2018;18(1):1–11. <https://doi.org/10.1186/s12879-018-3550-6> PMID: [30526540](https://pubmed.ncbi.nlm.nih.gov/30526540/)
46. De Marco G, Vazquez O, Gavira N, Ramadani A, Steiger C, Dayer R, et al. Surgery's role in contemporary osteoarticular infection management. *Front Pediatr*. 2022;10:1043251. <https://doi.org/10.3389/fped.2022.1043251> PMID: [36601031](https://pubmed.ncbi.nlm.nih.gov/36601031/)

47. Yi J, Wood JB, Creech CB, Williams D, Jimenez-Truque N, Yildirim I, et al. Clinical epidemiology and outcomes of pediatric musculoskeletal infections. *J Pediatr.* 2021;234:236–44. <https://doi.org/10.1016/j.jpeds.2021.03.028> PMID: [33771580](https://pubmed.ncbi.nlm.nih.gov/33771580/)
48. Li Y, Zhou Q, Liu Y, Chen W, Li J, Yuan Z, et al. Delayed treatment of septic arthritis in the neonate: a review of 52 cases. 2016.
49. Alvares PA, Mimica MJ. Osteoarticular infections in pediatrics. *J Pediatr (Rio J).* 2020;96:58–64. <https://doi.org/10.1016/j.jped.2019.10.005> PMID: [31783013](https://pubmed.ncbi.nlm.nih.gov/31783013/)
50. Sahli H, Bachali A, Tekaya R, Tekaya AB, Khalfallah R, Saidane O, et al. Clinical and laboratory characteristics in septic arthritis patients with and without isolated germs. *Egypt Rheumatol.* 2018;40:269–72.
51. Ferrand J, El Samad Y, Brunschweiler B, Grados F, Dehamchia-Rehailia N, Séjourne A, et al. Morbimortality in adult patients with septic arthritis: a three-year hospital-based study. *BMC Infect Dis.* 2016;16:1–10. <https://doi.org/10.1186/s12879-016-1540-0> PMID: [27246346](https://pubmed.ncbi.nlm.nih.gov/27246346/)
52. Song X, Xia C, Li Q, Yao C, Yao Y, Chen D, et al. Perioperative predictors of prolonged length of hospital stay following total knee arthroplasty: a retrospective study from a single center in China. *BMC Musculoskelet Disord.* 2020;21:1–8. <https://doi.org/10.1186/s12891-020-3042-x> PMID: [32005208](https://pubmed.ncbi.nlm.nih.gov/32005208/)
53. Slyamova G, Gusmanov A, Batpenov A, Kaliev N, Viderman D. Risk factors for postoperative osteomyelitis among patients after bone fracture: a matched case-control study. *J Clin Med.* 2022;11:6072. <https://doi.org/10.3390/jcm11206072> PMID: [36294391](https://pubmed.ncbi.nlm.nih.gov/36294391/)
54. Sodavarapu P, Sudesh P, Gopinathan NR, Jayashree M, Kumar P, Rangasamy K. Characteristics of musculoskeletal involvement in pediatric patients with disseminated sepsis in a Tertiary Care Center. *Indian J Orthop.* 2022;56:345–52. PMID: [34456342](https://pubmed.ncbi.nlm.nih.gov/34456342/)
